# Supplementary material
Source: PubMed Central journal article supplement (PMC1868048)
Supplement: pbio.0050105.st001.pdf [file pbio.0050105.st001.pdf]

**Supplemental Table 1.** Fecundity of *Dmc1*<sup>Mei11</sup>/+ females and sterility of *Dmc1*<sup>Mei11</sup>/*Dmc1*<sup>-</sup> females

| Geno                                                    | Strain     | # mated | # fertile | Mean size<br>1 <sup>st</sup> Litter |
|---------------------------------------------------------|------------|---------|-----------|-------------------------------------|
| +/+                                                     | B6         | 3       | 3         | 7.0                                 |
| <i>Dmc1</i> <sup>Mei11</sup> /+                         | B6         | 4       | 4         | 7.0                                 |
| +/+                                                     | C3H        | 4       | 4         | 5.3                                 |
| <i>Dmc1</i> <sup>Mei11</sup> /+                         | C3H        | 14      | 14        | 6.5                                 |
| +/+                                                     | (B6xC3H)F1 | 3       | 3         | 8.7                                 |
| <i>Dmc1</i> <sup>Mei11</sup> /+                         | (B6xC3H)F1 | 5       | 5         | 9.0                                 |
| <i>Dmc1</i> <sup>Mei11</sup> / <i>Dmc1</i> <sup>-</sup> | (B6xC3H)F1 | 3       | 0         | na                                  |
| <i>Dmc1</i> <sup>Mei11</sup> / <i>Dmc1</i> <sup>-</sup> | B6         | 2       | 0         | na                                  |
