# Supplementary material
Source: PubMed Central journal article supplement (PMC1868048)

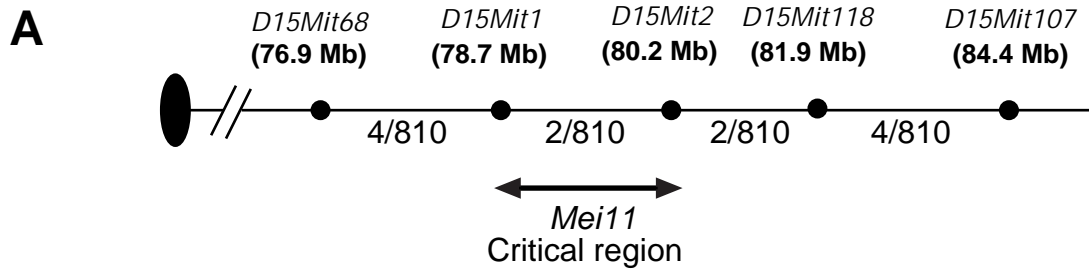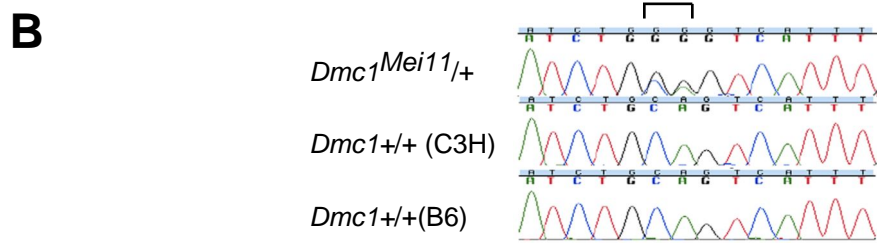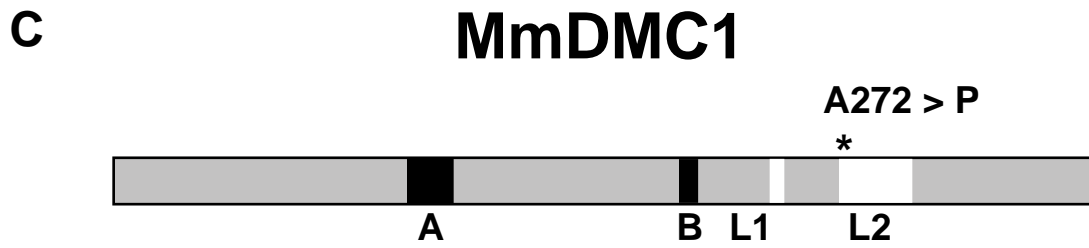

Figure S1

Supplement: pbio.0050105.sg001.pdf [file pbio.0050105.sg001.pdf]

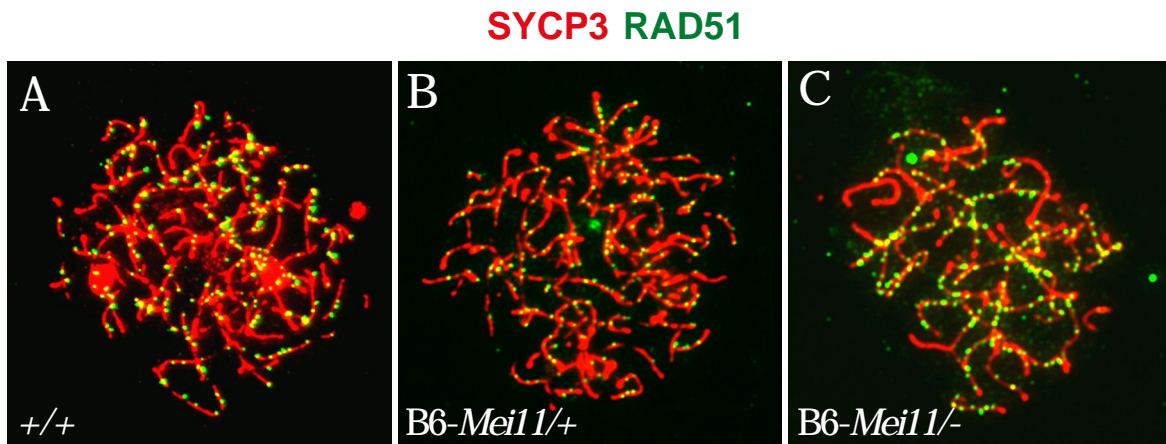

Figure S2

Supplement: pbio.0050105.sg002.pdf [file pbio.0050105.sg002.pdf]

**STAG3** **DMC1**

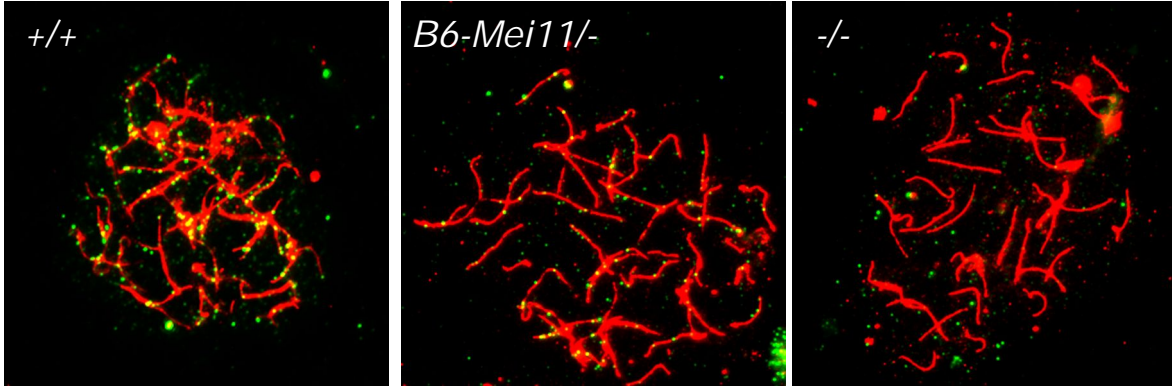

Figure S3

Supplement: pbio.0050105.sg003.pdf [file pbio.0050105.sg003.pdf]

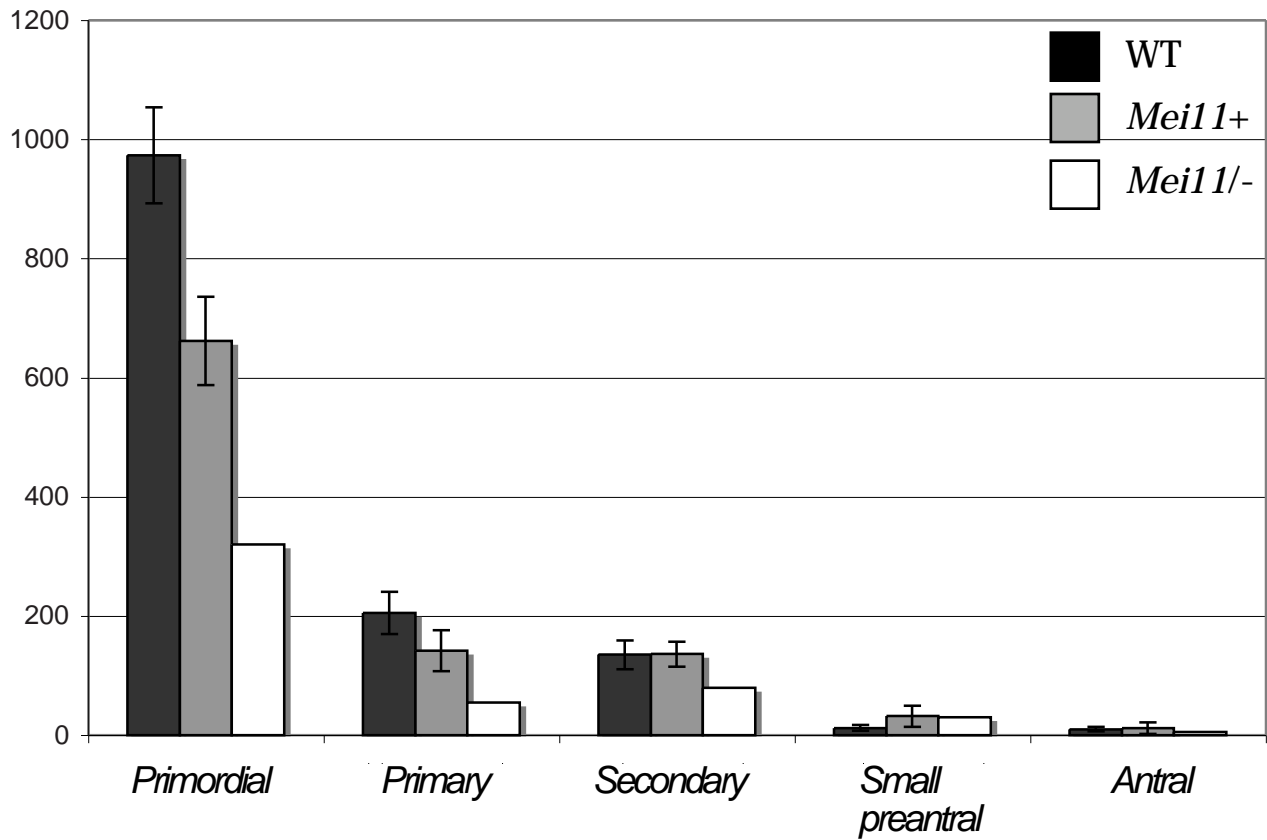

Ovarian follicle counts of 6 wk old females (B6)

Figure S4

Supplement: pbio.0050105.sg004.pdf [file pbio.0050105.sg004.pdf]

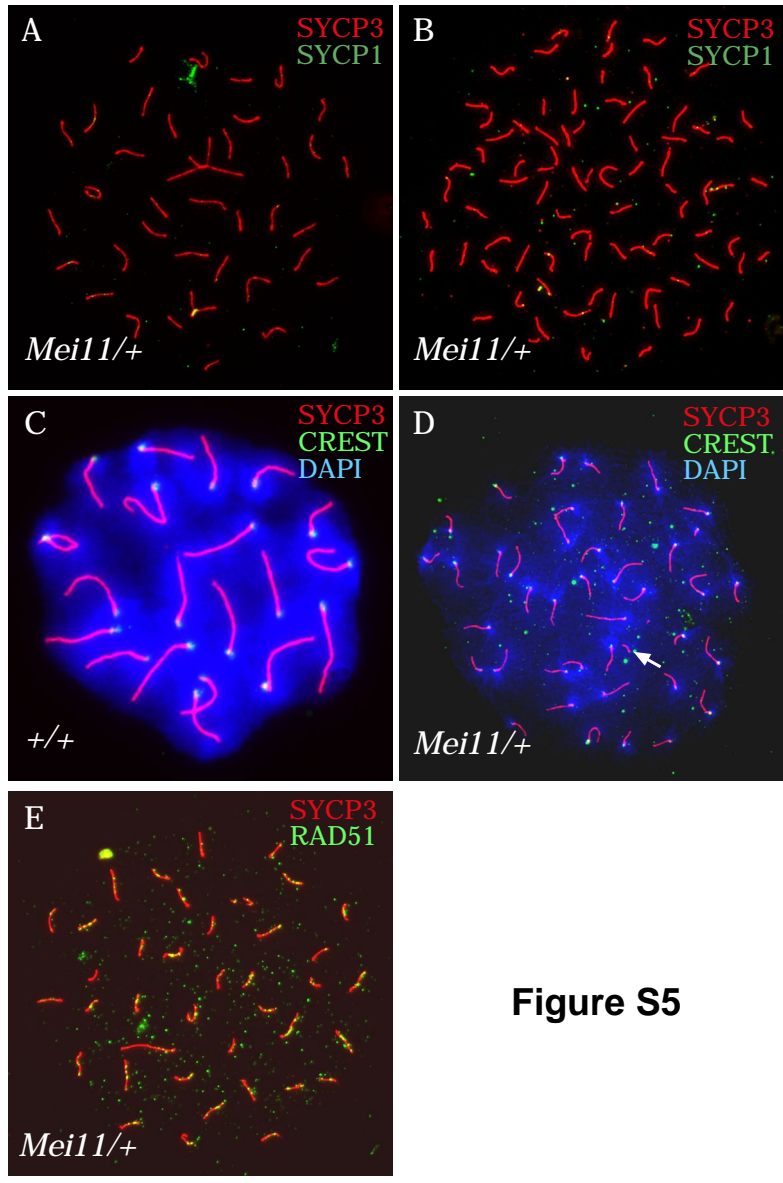

Figure S5

Supplement: pbio.0050105.sg005.pdf [file pbio.0050105.sg005.pdf]

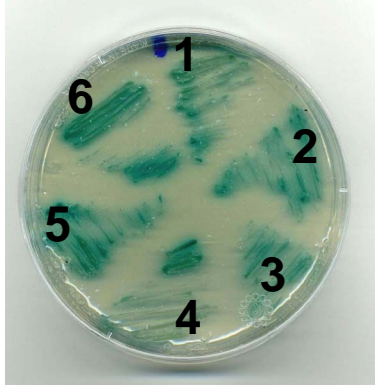

**Figure S6**

Supplement: pbio.0050105.sg006.pdf [file pbio.0050105.sg006.pdf]

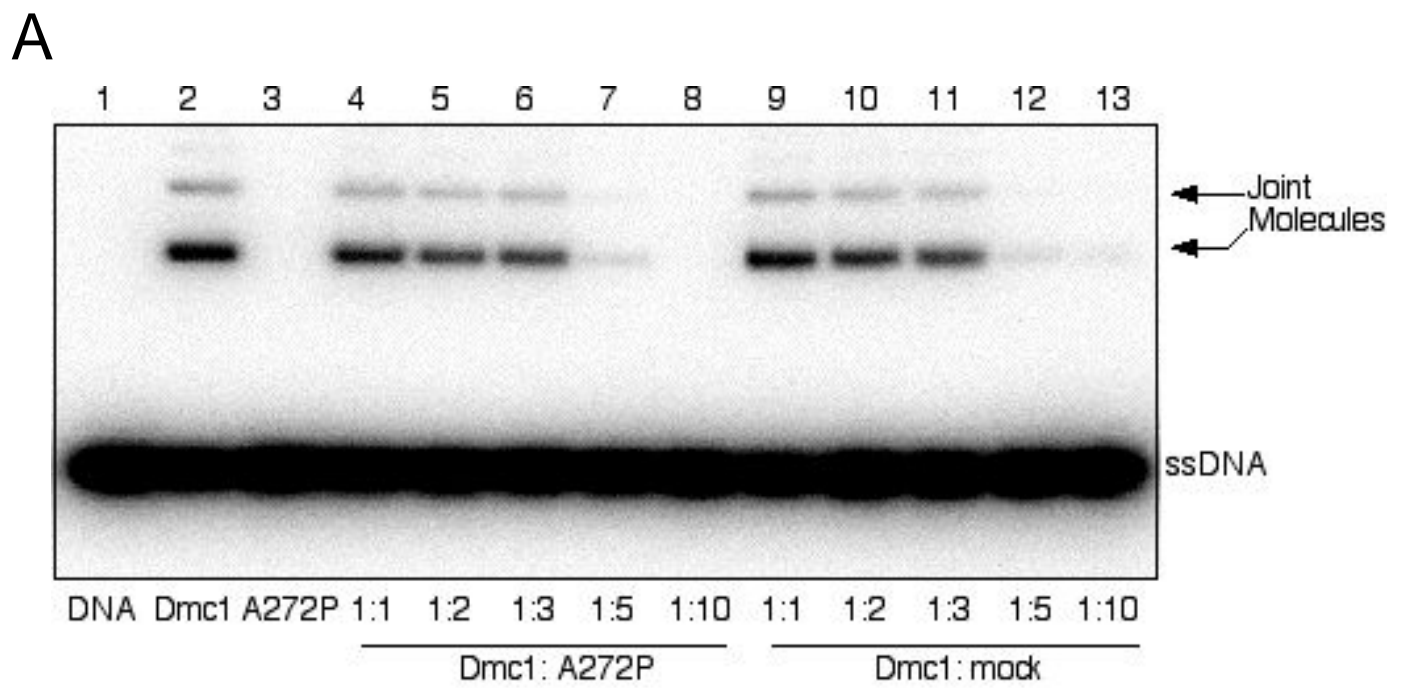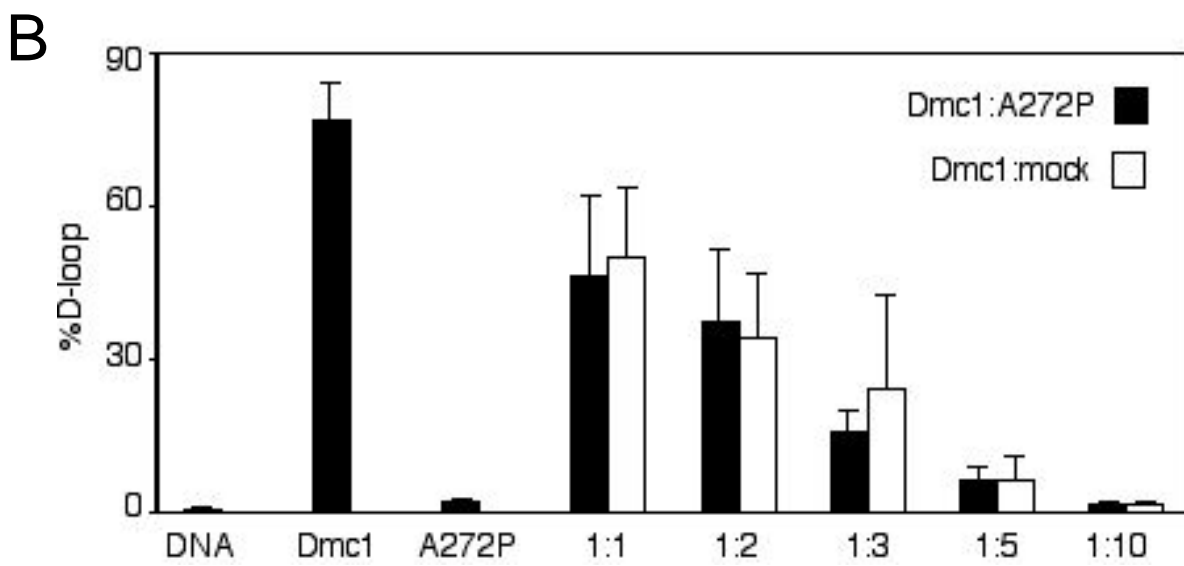

**Figure S7**

Supplement: pbio.0050105.sg007.pdf [file pbio.0050105.sg007.pdf]
